# Supplementary material
Source: publisher figshare collection journal article supplement (https://frontiersin.figshare.com/ndownloader/files/28848840)
Supplement: Supplementary file [file 28848840]

A)

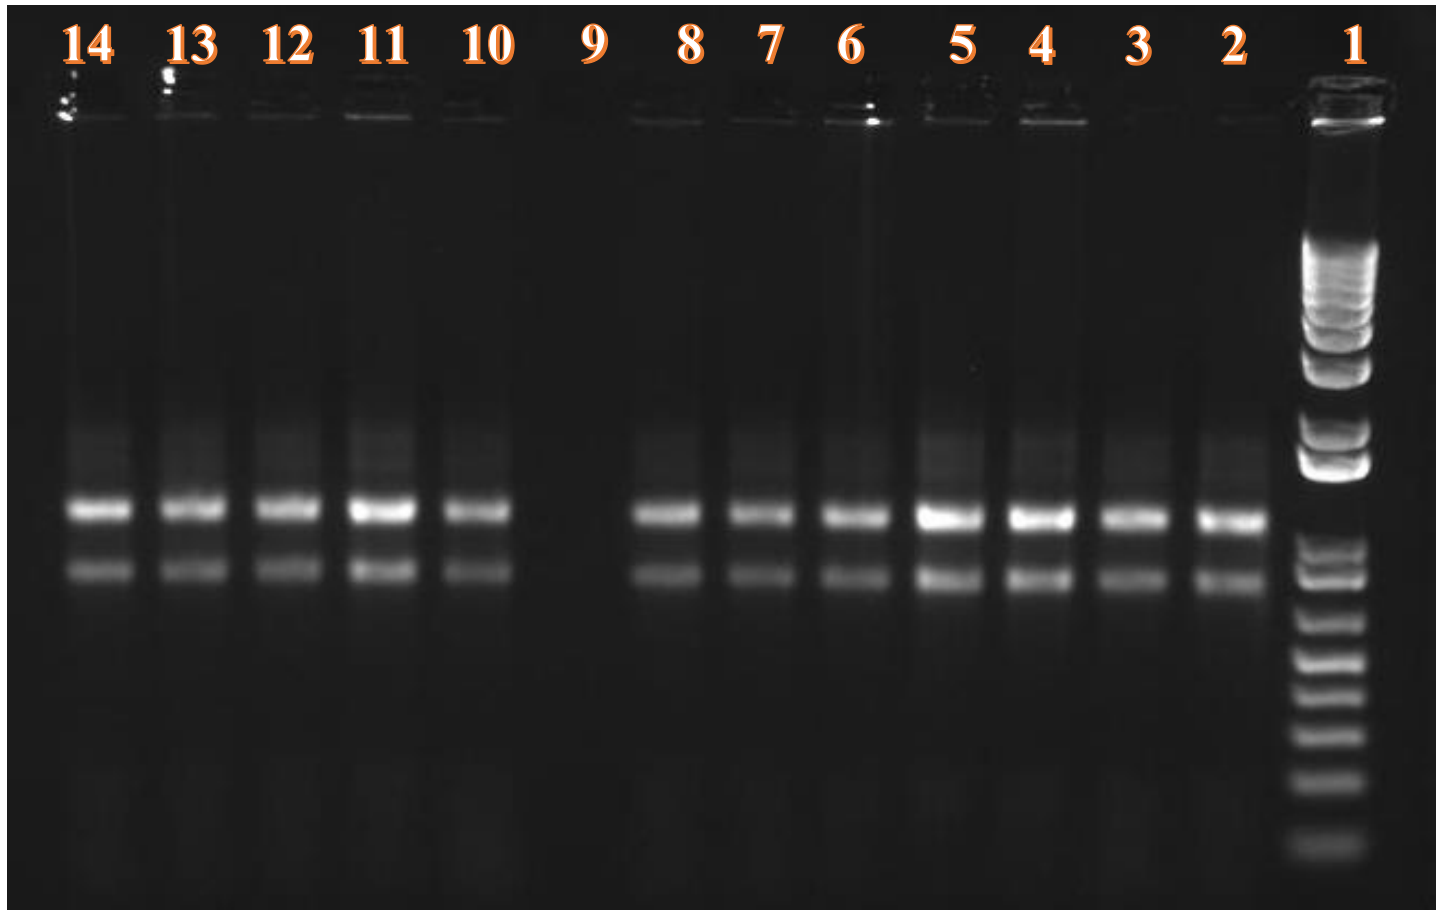

Lane 1: Ladder.

Lane 2: SH1009\_1

Lane 3: SH1009\_2

Lane 4: SH1009\_3

Lane 7: SH9051\_4

Lane 8: SH9051\_5

Lane 10: SH9051\_3

Lane 12: Untreated\_1

Lane 13: Untreated\_2

Lane 14: Untreated\_3

**B)**

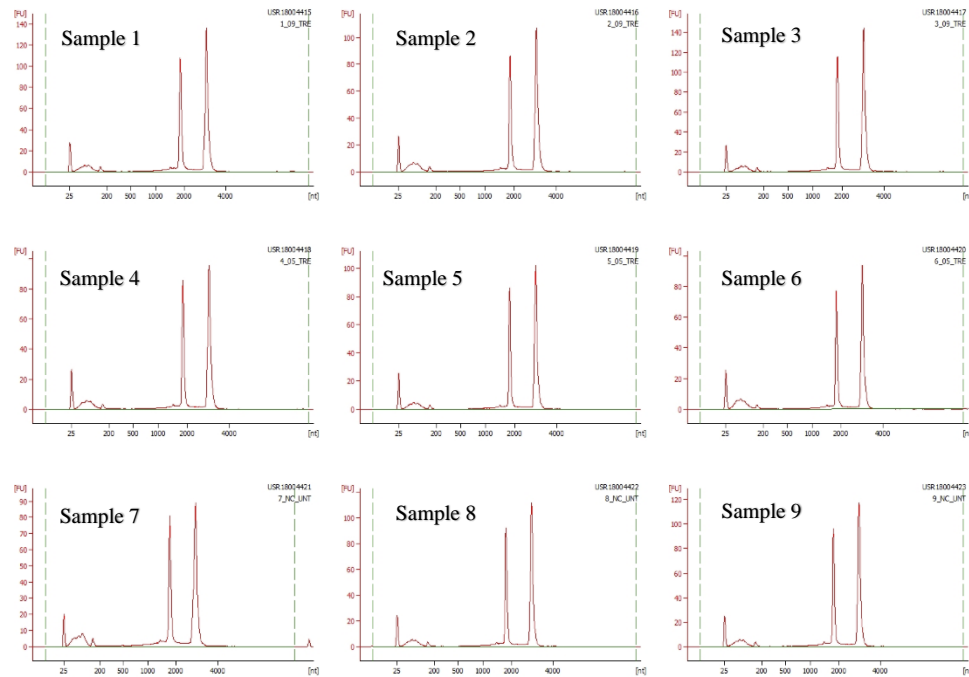

| Sample Nr. | Sample Name | Amt. (µg) | 260/280ratio | RIN |
|------------|-------------|-----------|--------------|-----|
| 1          | SH1009_1    | 2.550     | 2.09         | 10  |
| 2          | SH1009_2    | 1.890     | 2.06         | 10  |
| 3          | SH1009_3    | 2.340     | 2.10         | 10  |
| 4          | SH9051_1    | 1.750     | 2.08         | 9.9 |
| 5          | SH9051_2    | 1.550     | 2.00         | 10  |
| 6          | SH9051_3    | 1.630     | 2.03         | 10  |
| 7          | Untreated_1 | 2.620     | 2.10         | 9.7 |
| 8          | Untreated_2 | 1.770     | 2.00         | 10  |
| 9          | Untreated_3 | 1.900     | 2.06         | 10  |

**S1 File: Isolated RNA samples quantity, quality, and integrity:** **A)** 1% agarose along with 1% v/v bleach TAE gel. Each well was loaded with 2 µL 6× DNA Loading dye + 10 µL of ≥ 1.5 µg of total RNA isolated from SH1009- and SH9051-treated, and untreated *Candida albicans* SC5314 cells. All samples were run for ~30 min at a constant 120V in 1% TAE buffer. The presence of clean 2:1 ratios of 28S and 18S ribosomal RNA (rRNA) bands suggested intact RNA samples without DNA contamination (1). **B)** Agilent Bioanalyzer analysis of RNA integrity. The fluorescence signal generated by the Agilent Bioanalyzer instrument indicated intact RNA samples with RIN (RNA Integrity Number) values range from 9.7 to 10 with two discrete peaks corresponding to 18S and 28S rRNA bands on the gel.

Reference:

1. Aranda PS, LaJoie DM, Jorcyk CL. Bleach gel: a simple agarose gel for analyzing RNA quality. Electrophoresis. 2012;33(2):366-9.
